# Supplementary material for: Synthesis of mesoporous antimony-doped tin oxide (ATO) thin films and investigation of their electrical conductivity
Source: Royal Society of Chemistry journal article supplement (doi:10.1039/c3ce40189h), 2013-01-01
Supplement: c3ce40189h.pdf [file c3ce40189h.pdf]

**Table S1** Structural and electrical properties of synthesized mesoporous ATO thin films. Average thickness was determined by stylus profiler. *d*-spacing was calculated from GI-SAXS (in-plane) profile. Sheet resistance and resistivity were measured by four-probe method.

| Sample     | Average Thickness (nm) | Sheet Resistance (k $\Omega$ / $\square$ ) | Resistivity ( $\Omega$ cm) | <i>d</i> -spacing (nm) |
|------------|------------------------|--------------------------------------------|----------------------------|------------------------|
| ATO_5_600  | 123.65                 | 1.92                                       | $2.35 \times 10^{-2}$      | —                      |
| ATO_10_600 | 254.57                 | 4.23                                       | $1.02 \times 10^{-1}$      | —                      |
| ATO_20_600 | 294.78                 | 23.26                                      | $6.78 \times 10^{-1}$      | —                      |
| ATO_30_600 | 276.91                 | 41.68                                      | $1.11 \times 10^0$         | —                      |
| ATO_40_600 | 217.93                 | 17.53                                      | $3.70 \times 10^{-1}$      | 36.1                   |
| ATO_50_600 | 175.85                 | 7.86                                       | $1.32 \times 10^{-1}$      | 30.7                   |
| ATO_60_600 | 179.35                 | 6.34                                       | $1.08 \times 10^{-1}$      | 30.7                   |
| ATO_70_600 | 174.66                 | 6.64                                       | $1.14 \times 10^{-1}$      | 29.2                   |
| ATO_5_800  | 117.59                 | 1.19                                       | $1.29 \times 10^{-2}$      | —                      |
| ATO_10_800 | 256.46                 | 5.68                                       | $1.41 \times 10^{-1}$      | —                      |
| ATO_20_800 | 284.44                 | 21.02                                      | $5.97 \times 10^{-1}$      | —                      |
| ATO_30_800 | 221.81                 | 46.95                                      | $9.98 \times 10^{-1}$      | —                      |
| ATO_40_800 | 201.33                 | 16.65                                      | $3.32 \times 10^{-1}$      | —                      |
| ATO_50_800 | 160.78                 | 5.35                                       | $8.04 \times 10^{-2}$      | 34.1                   |
| ATO_60_800 | 170.22                 | 4.91                                       | $7.66 \times 10^{-2}$      | 32.2                   |
| ATO_70_800 | 160.79                 | 4.51                                       | $6.43 \times 10^{-2}$      | 32.2                   |

**Figure S1**

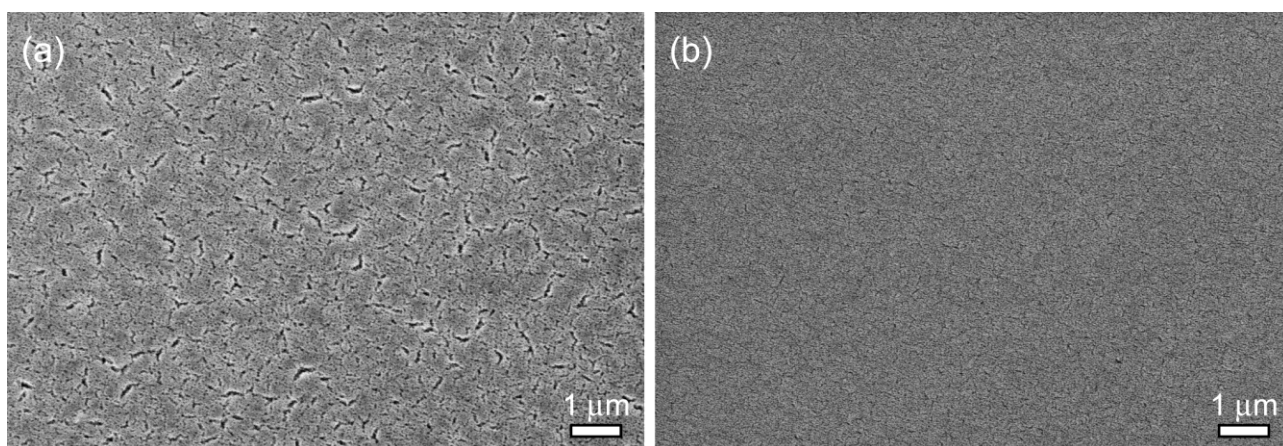

**Figure S1** Low-magnified SEM images of (a) **ATO\_5\_600** and (b) **ATO\_10\_600**.

**Figure S2**

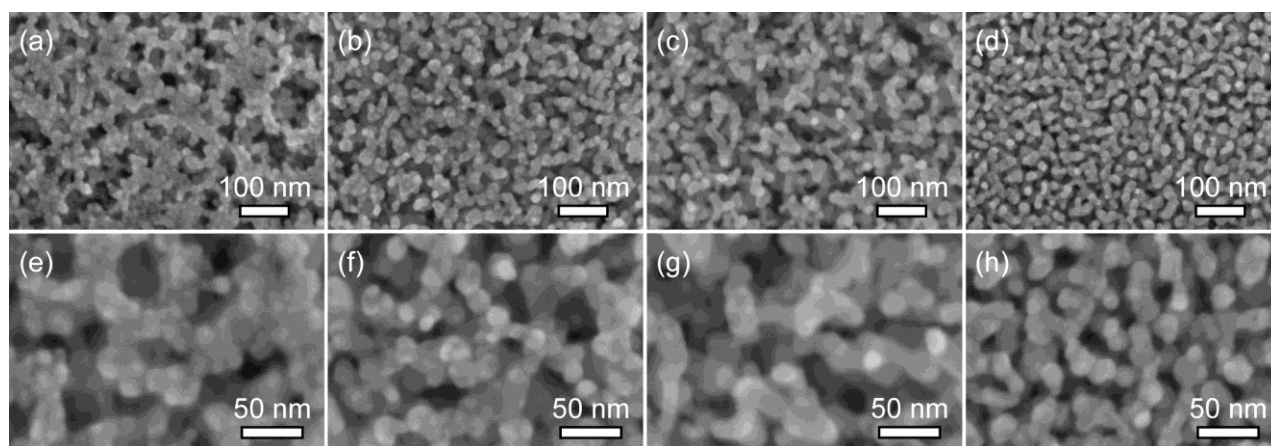

**Figure S2** Top-view SEM images of (a) **ATO\_5\_800**, (b) **ATO\_10\_800**, (c) **ATO\_30\_800**, (d) **ATO\_50\_800** and magnified SEM images of (e) **ATO\_5\_800**, (f) **ATO\_10\_800**, (g) **ATO\_30\_800**, and (h) **ATO\_50\_800**.

**Figure S3**

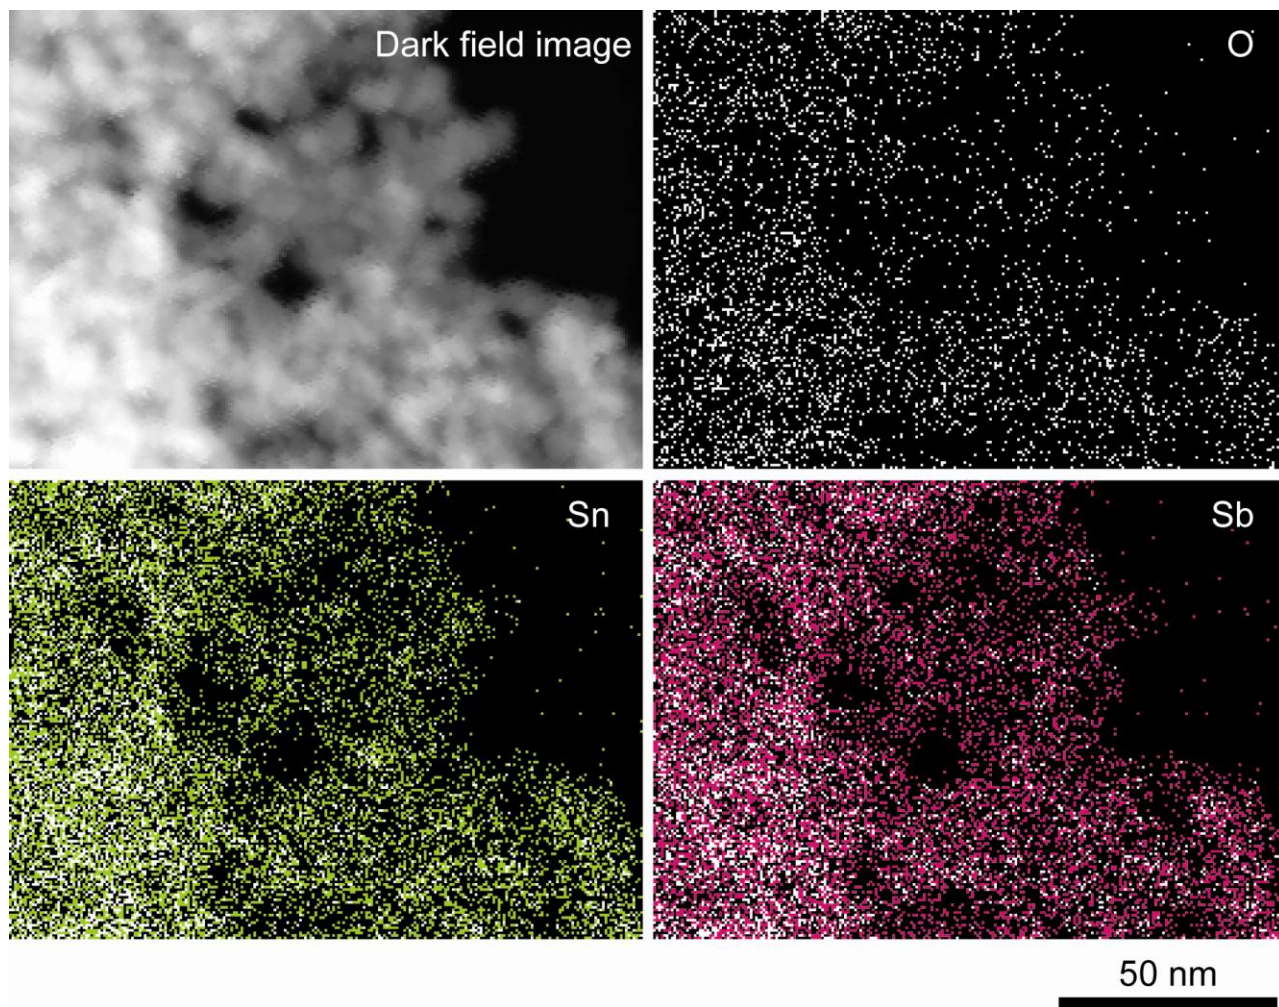

**Figure S3.** Dark field SEM image and EDS elemental mapping of **ATO\_50\_600**.



**Figure S4**

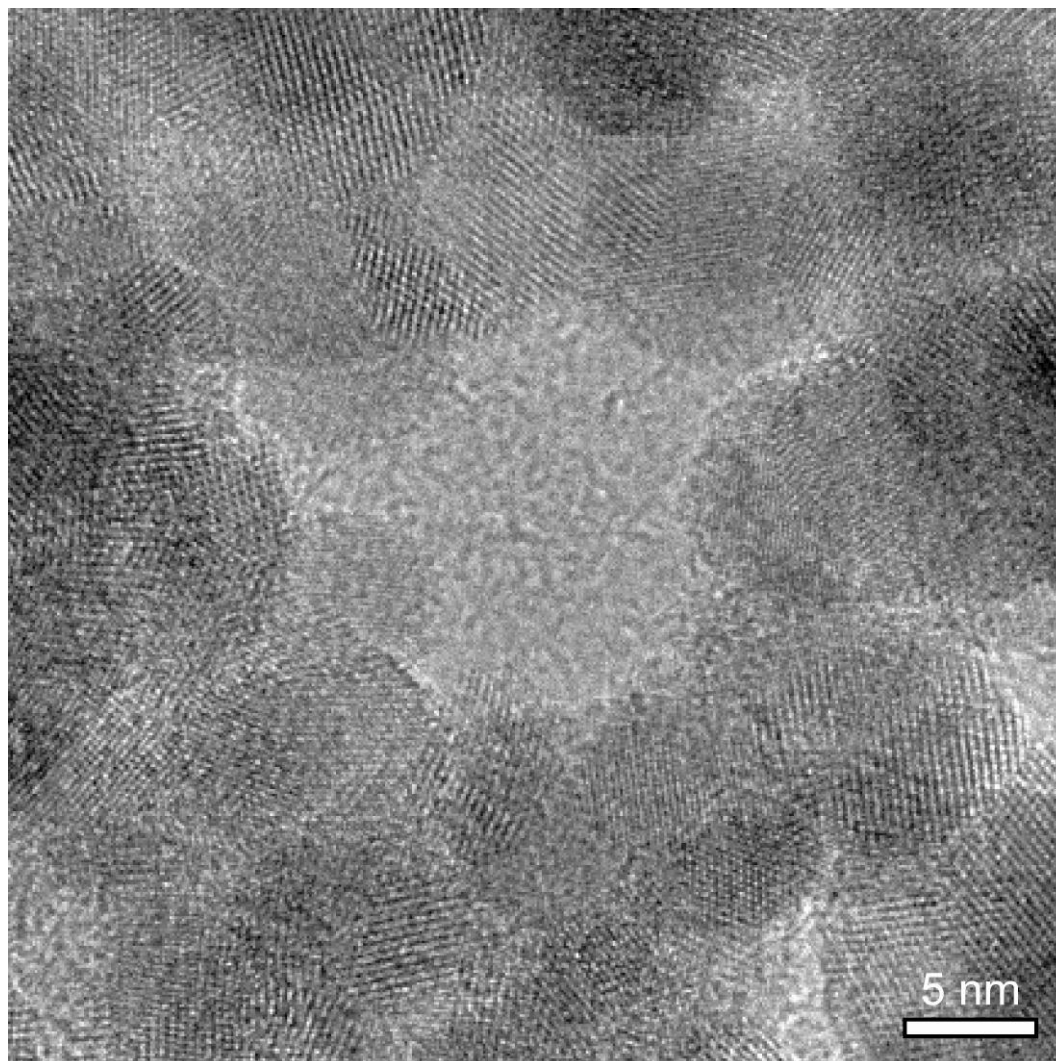

**Figure S4.** Enlarged image of high-magnified TEM image of **ATO\_50\_600** (Figure 2b).
